# Supplementary material
Source: PubMed Central journal article supplement (PMC3443163)

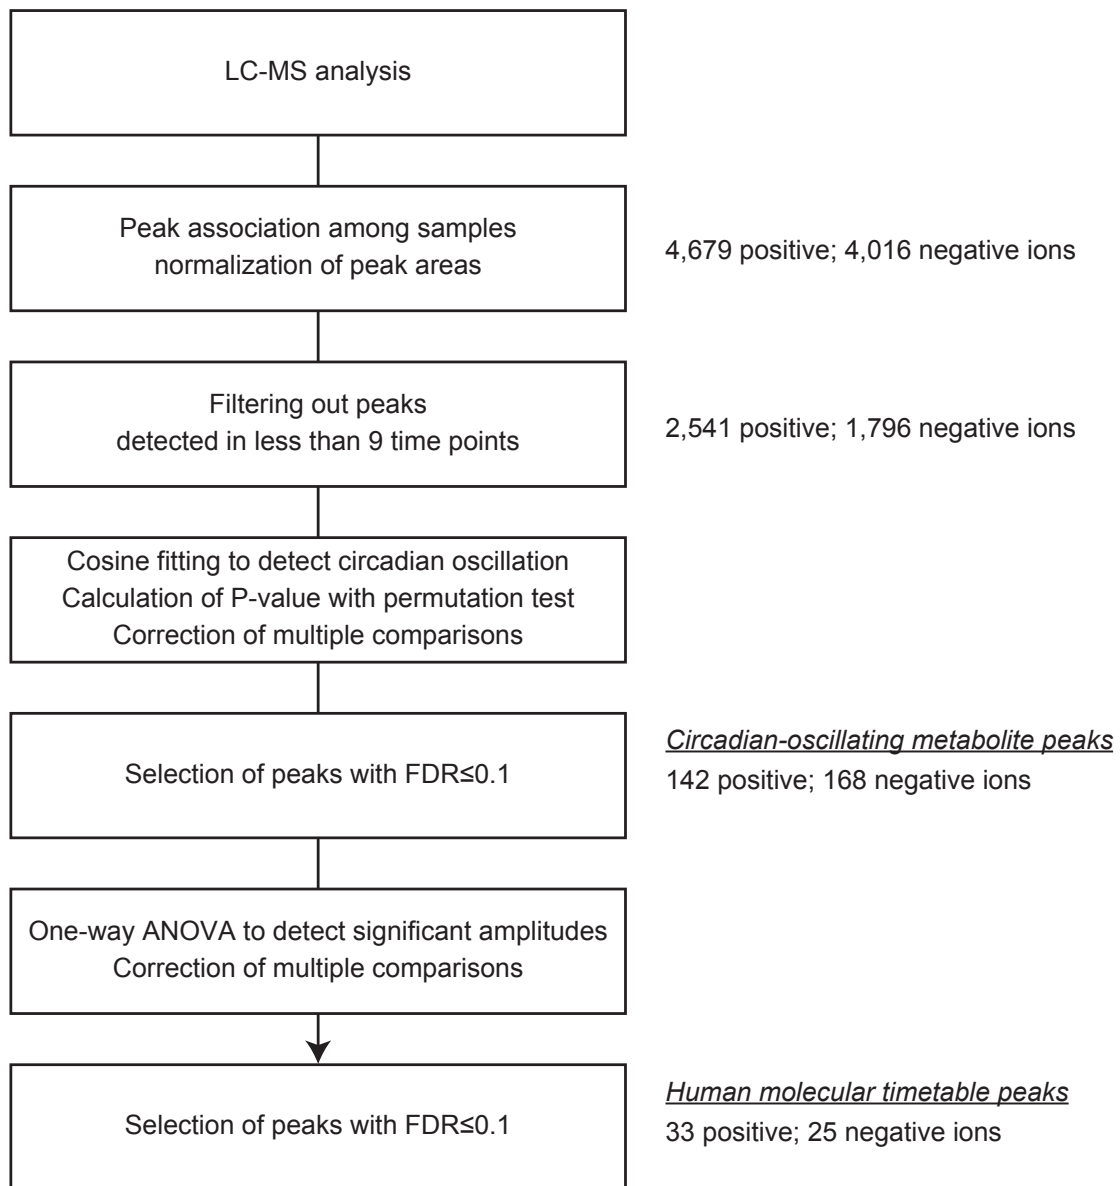

Fig. S1

Supplement: 1207768109_sfig01.pdf [file 1207768109_sfig01.pdf]

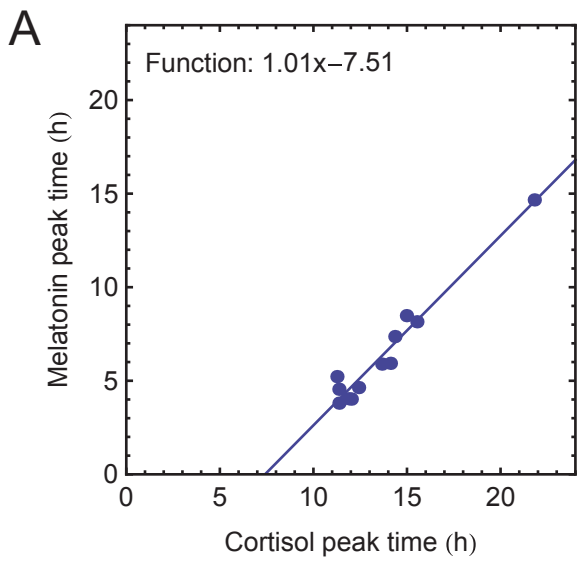

Fig. S2

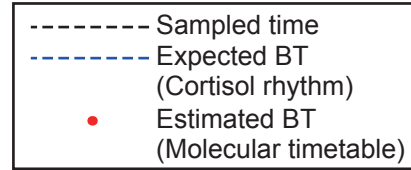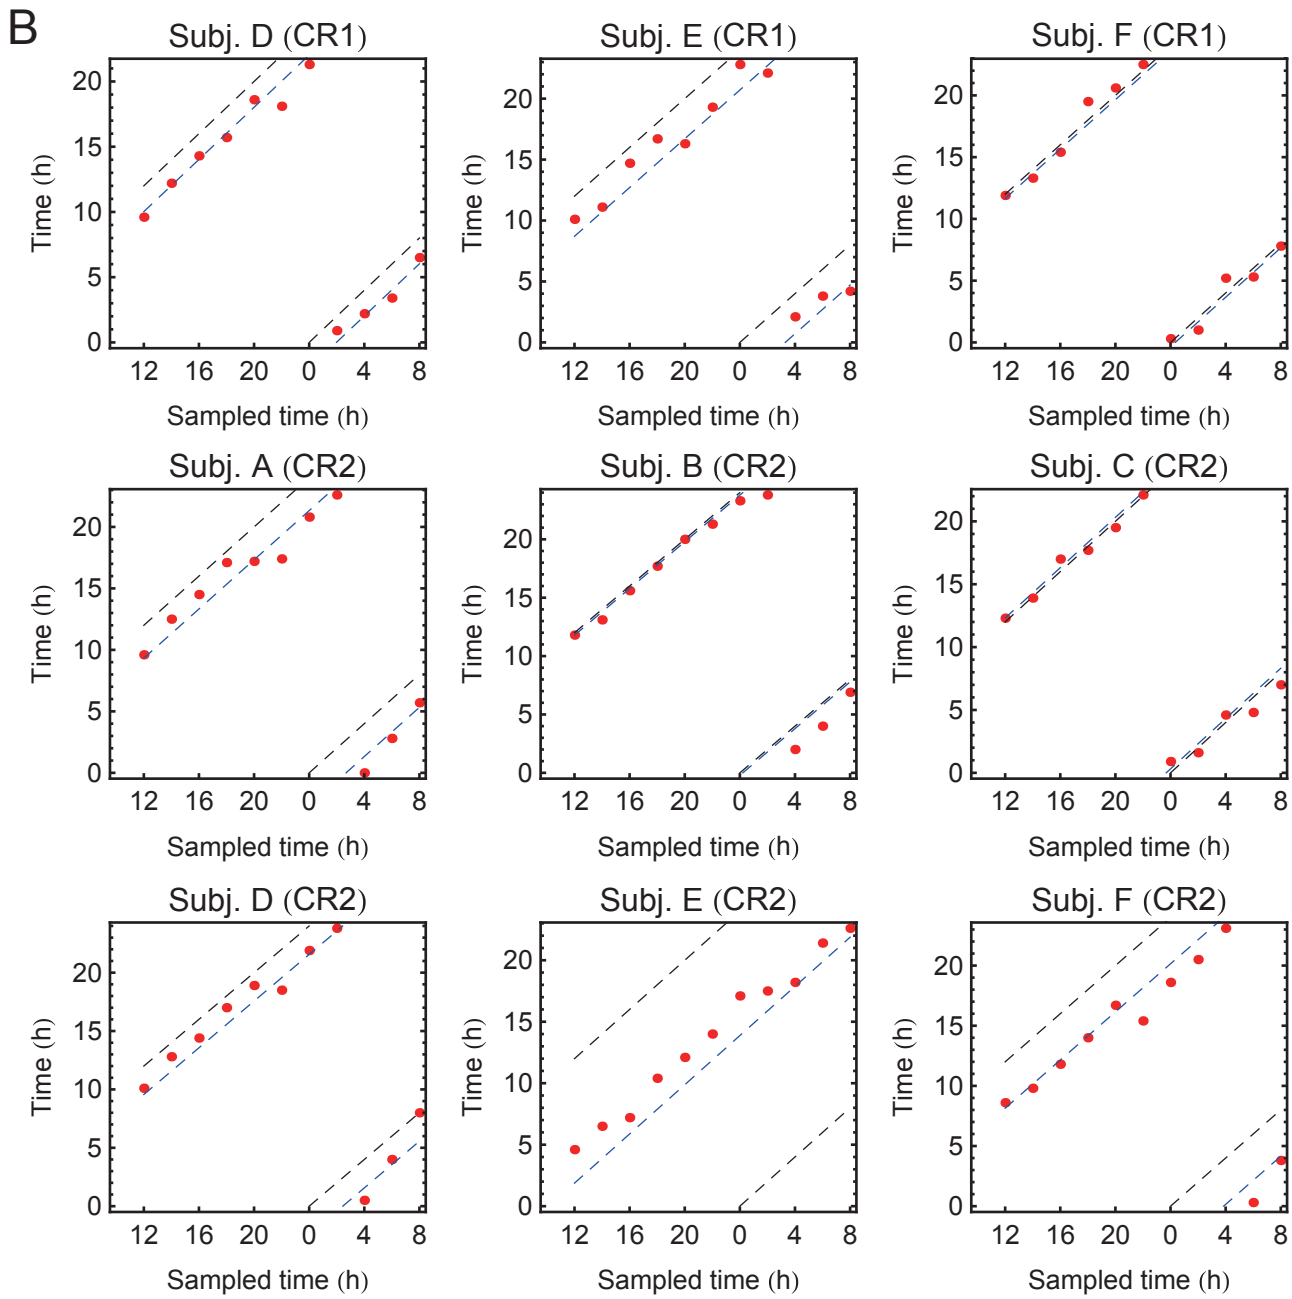

**C**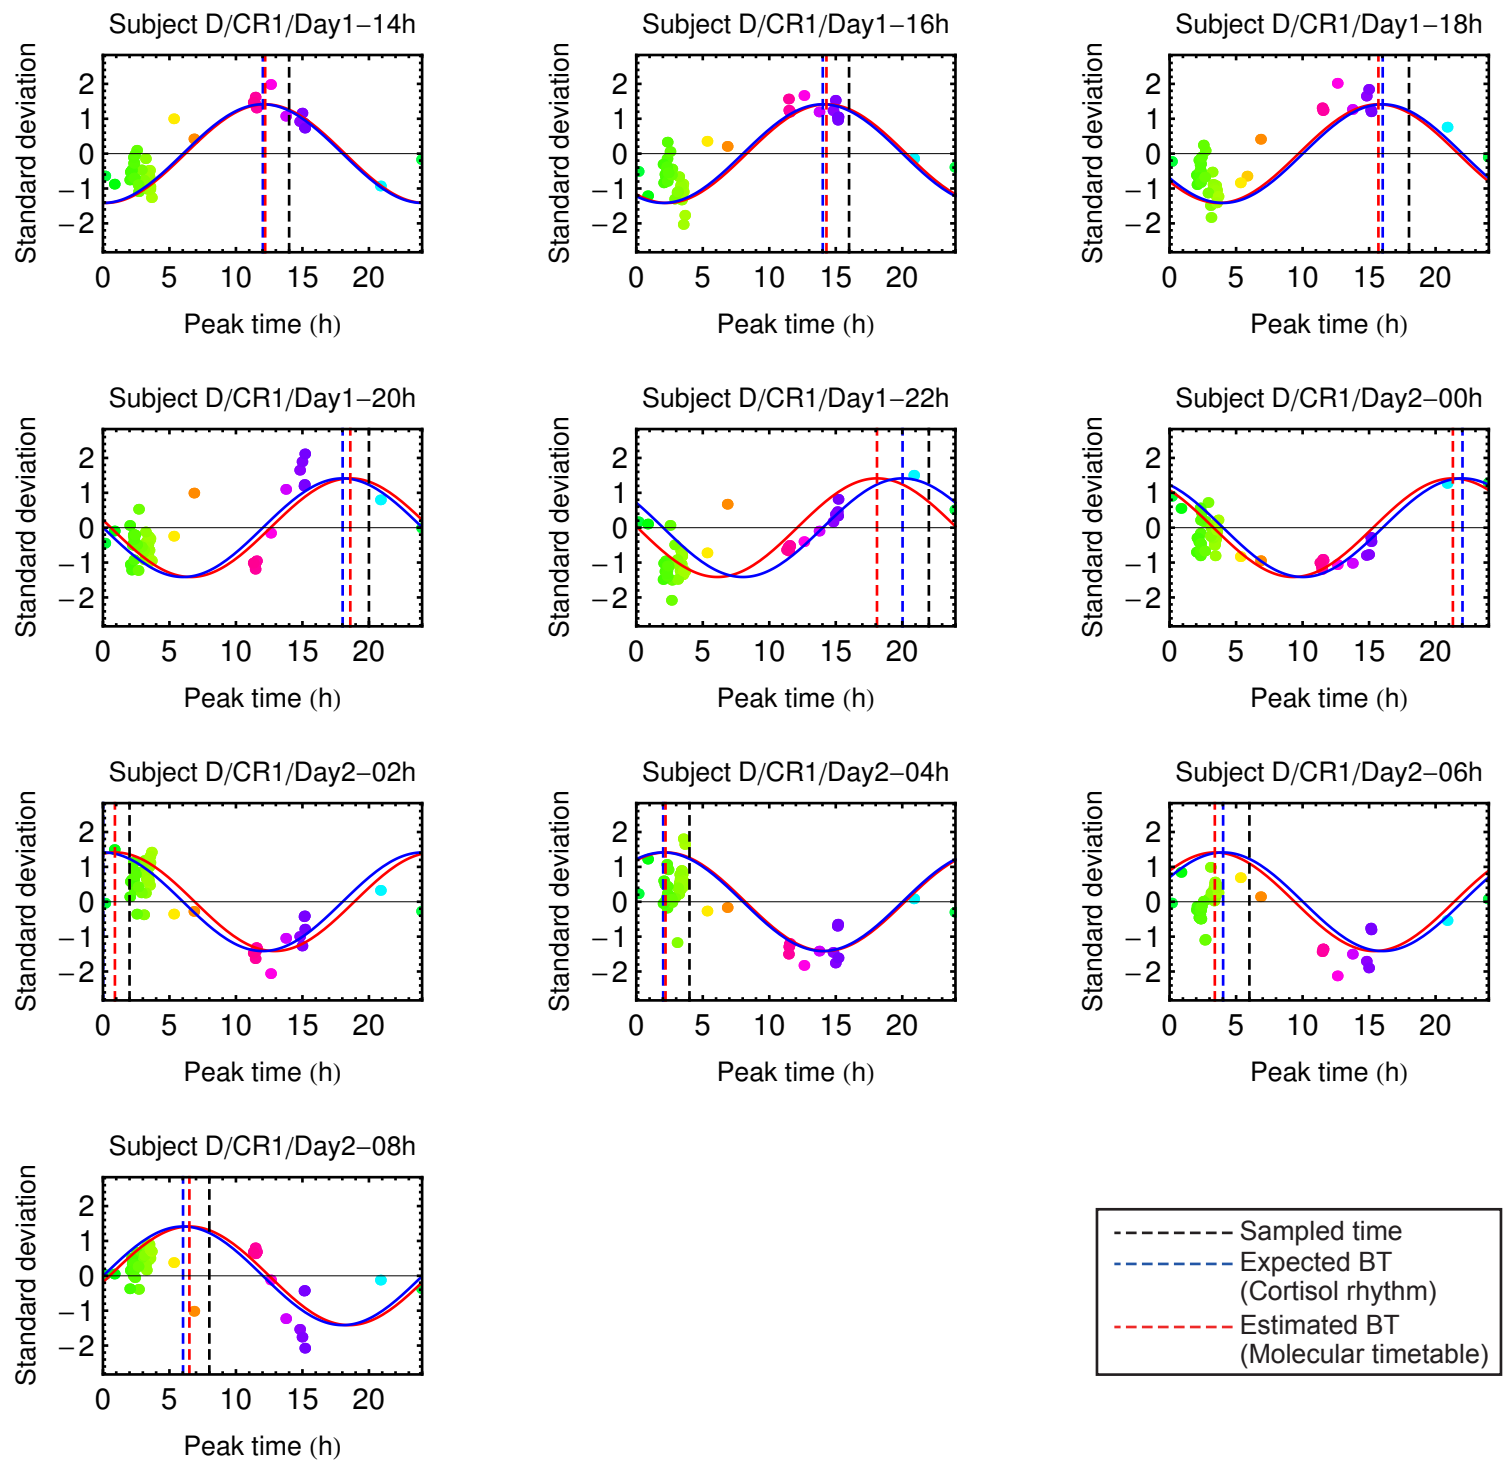

Fig. S2

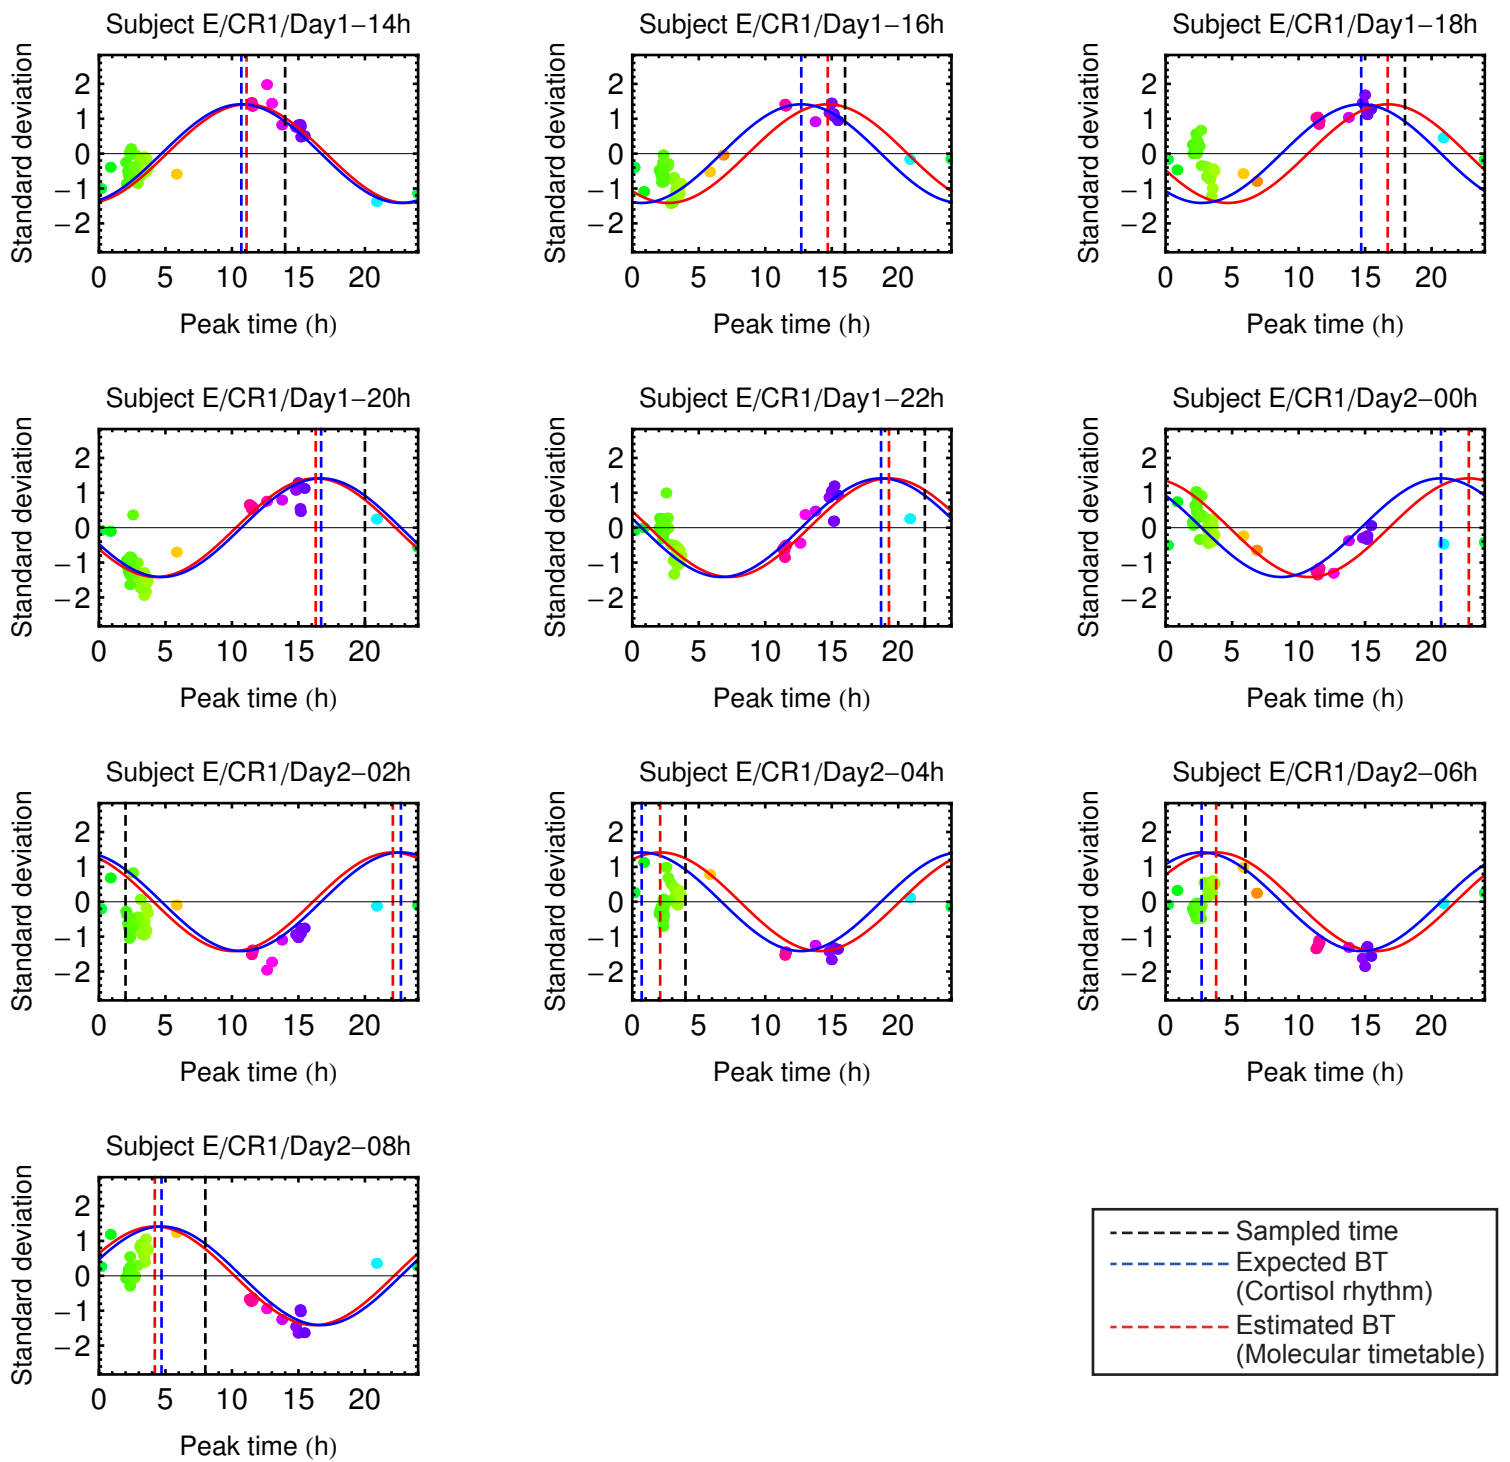

Fig. S2

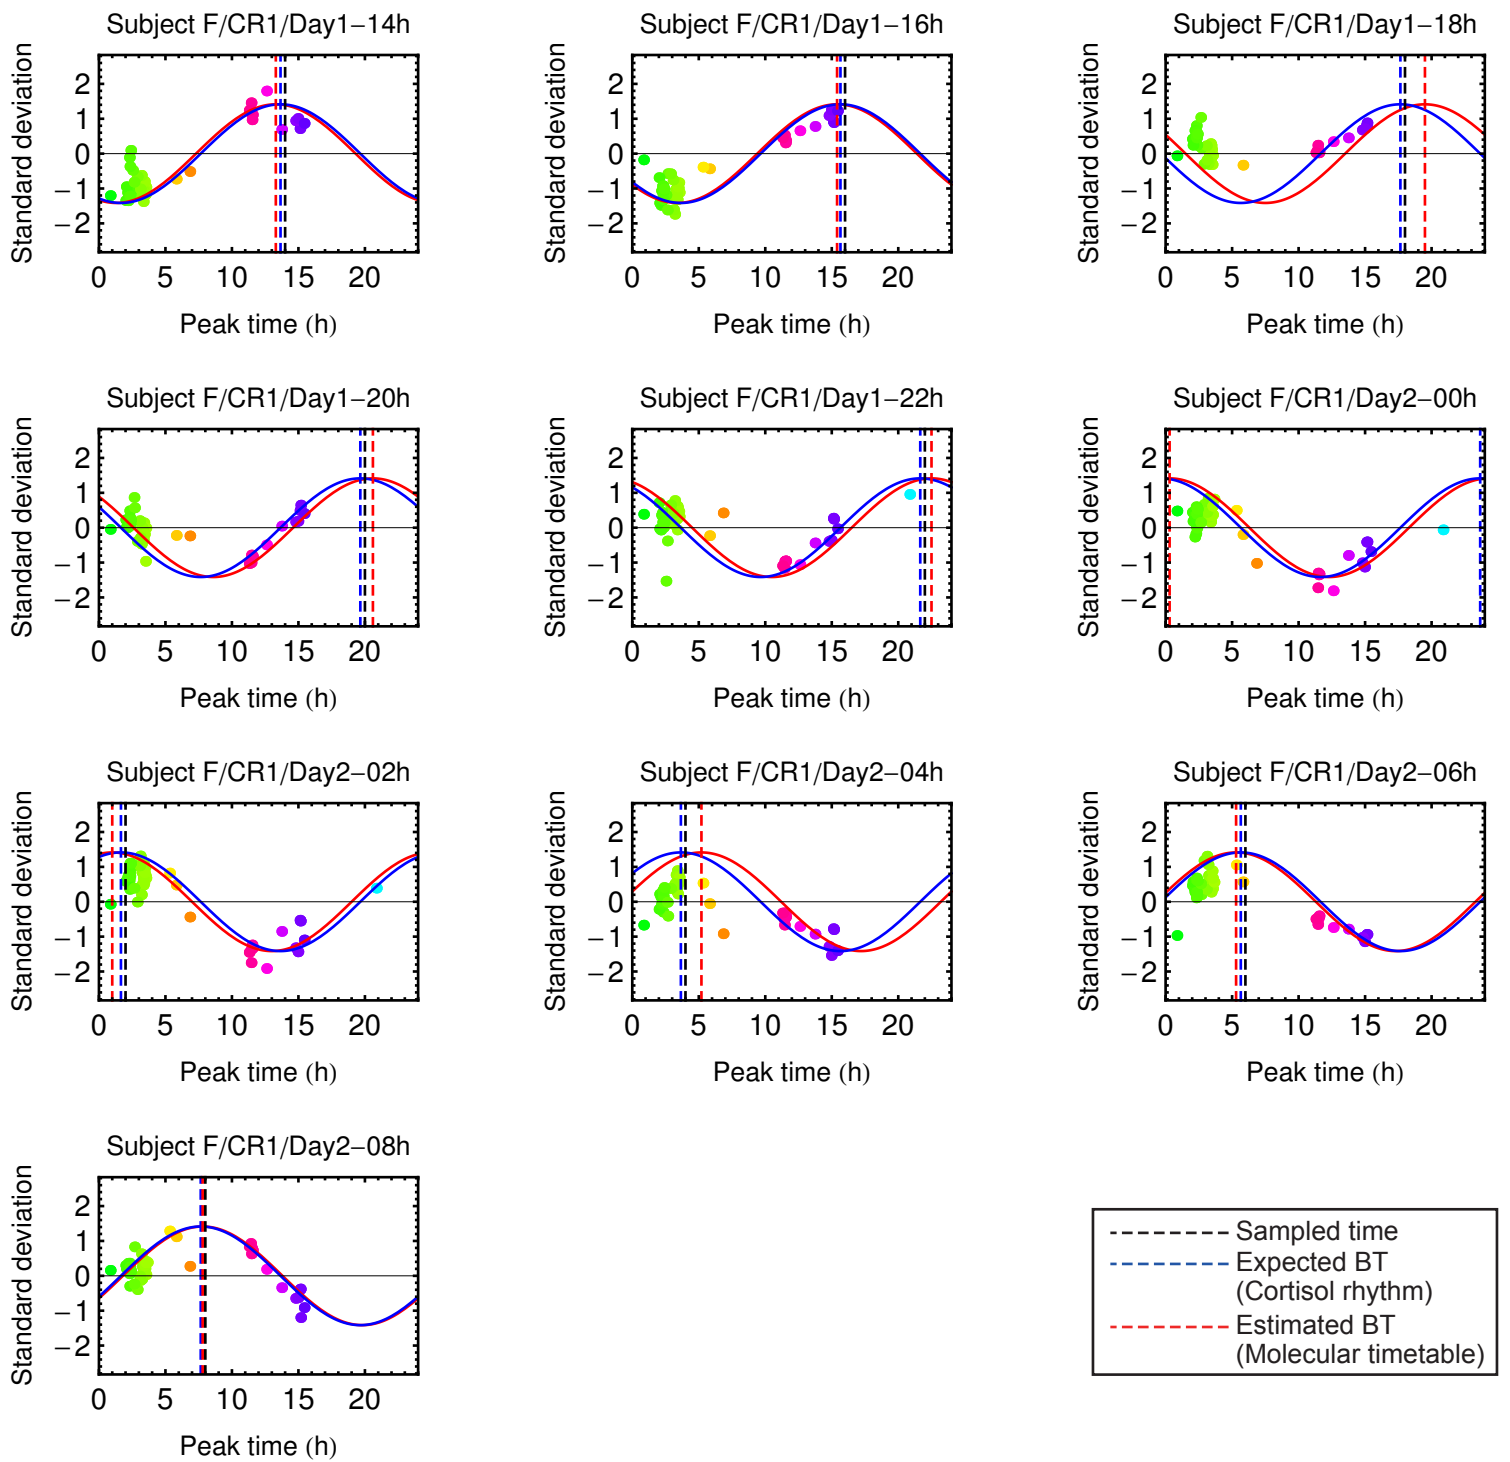

Fig. S2

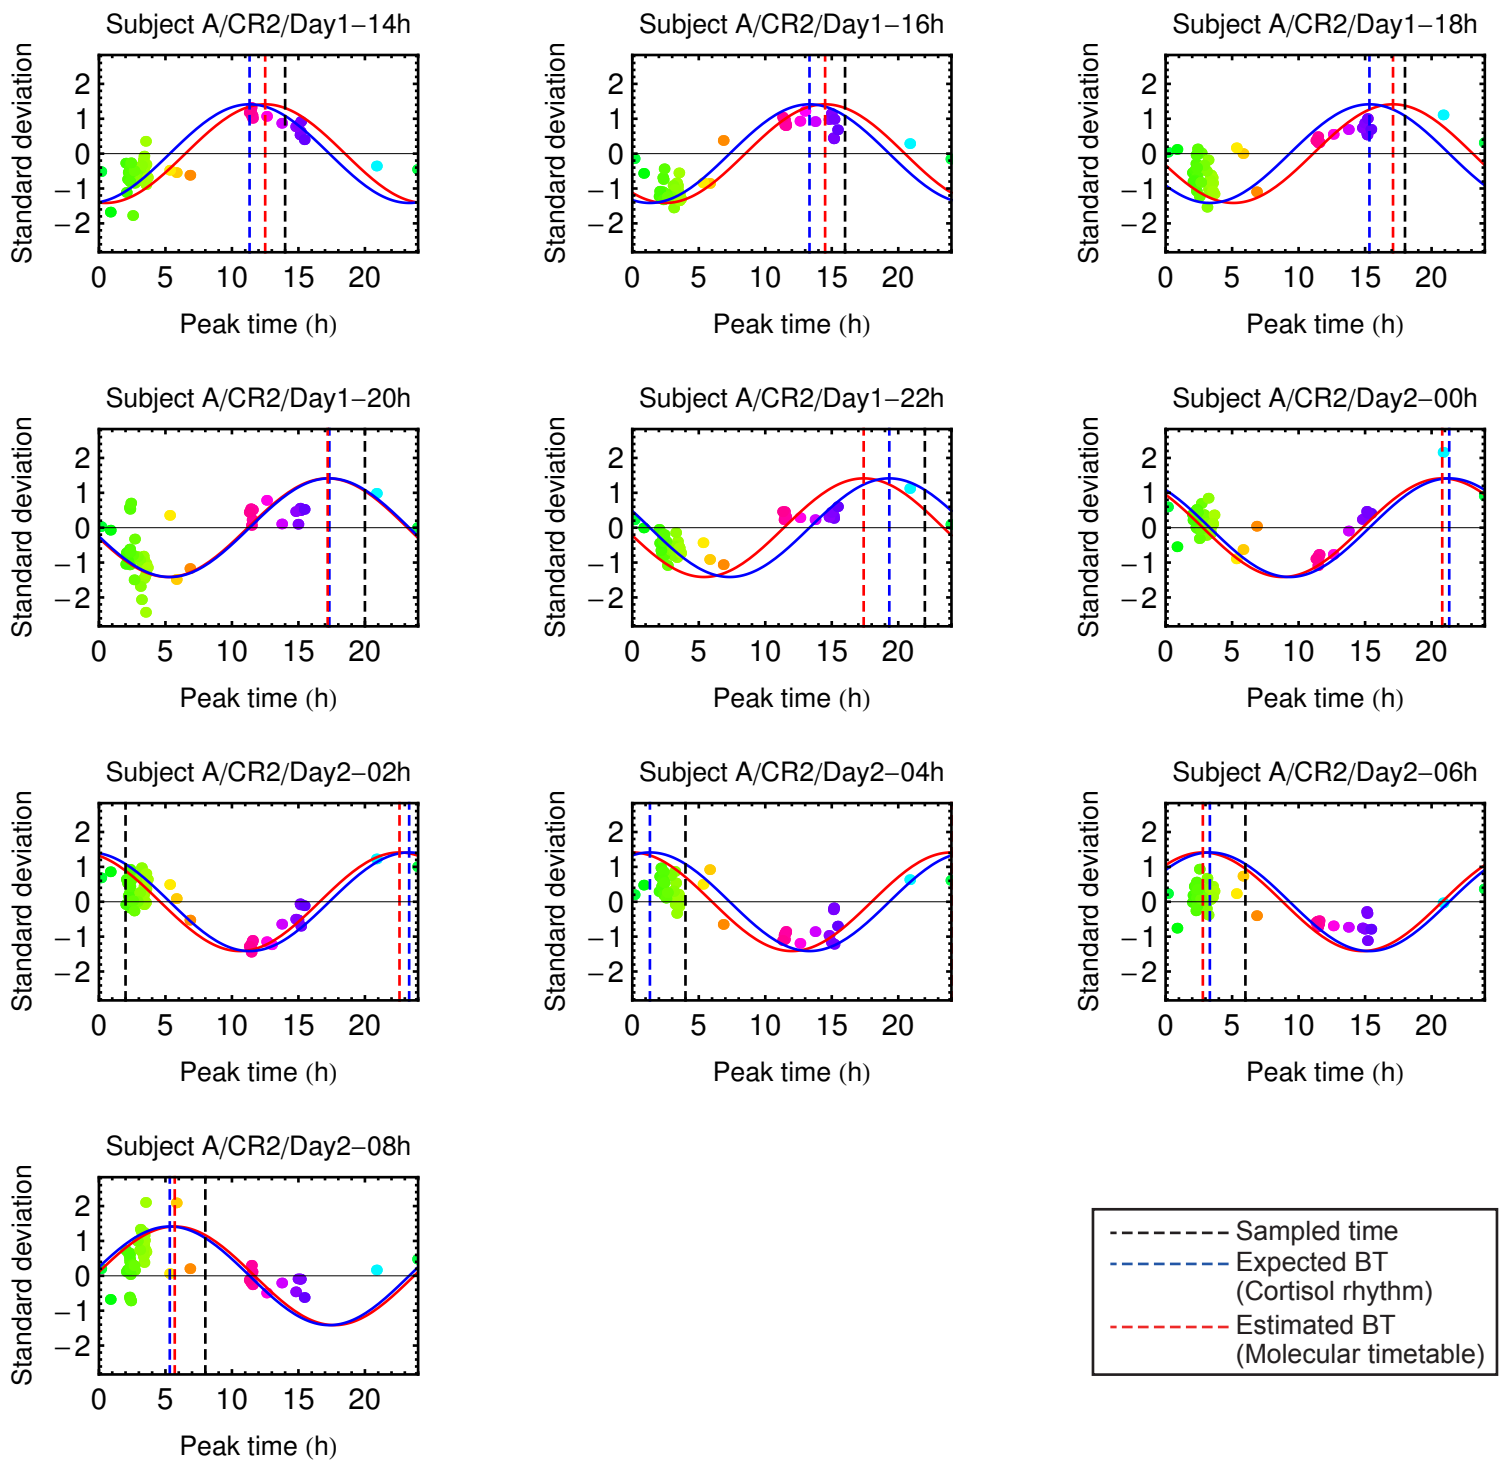

Fig. S2

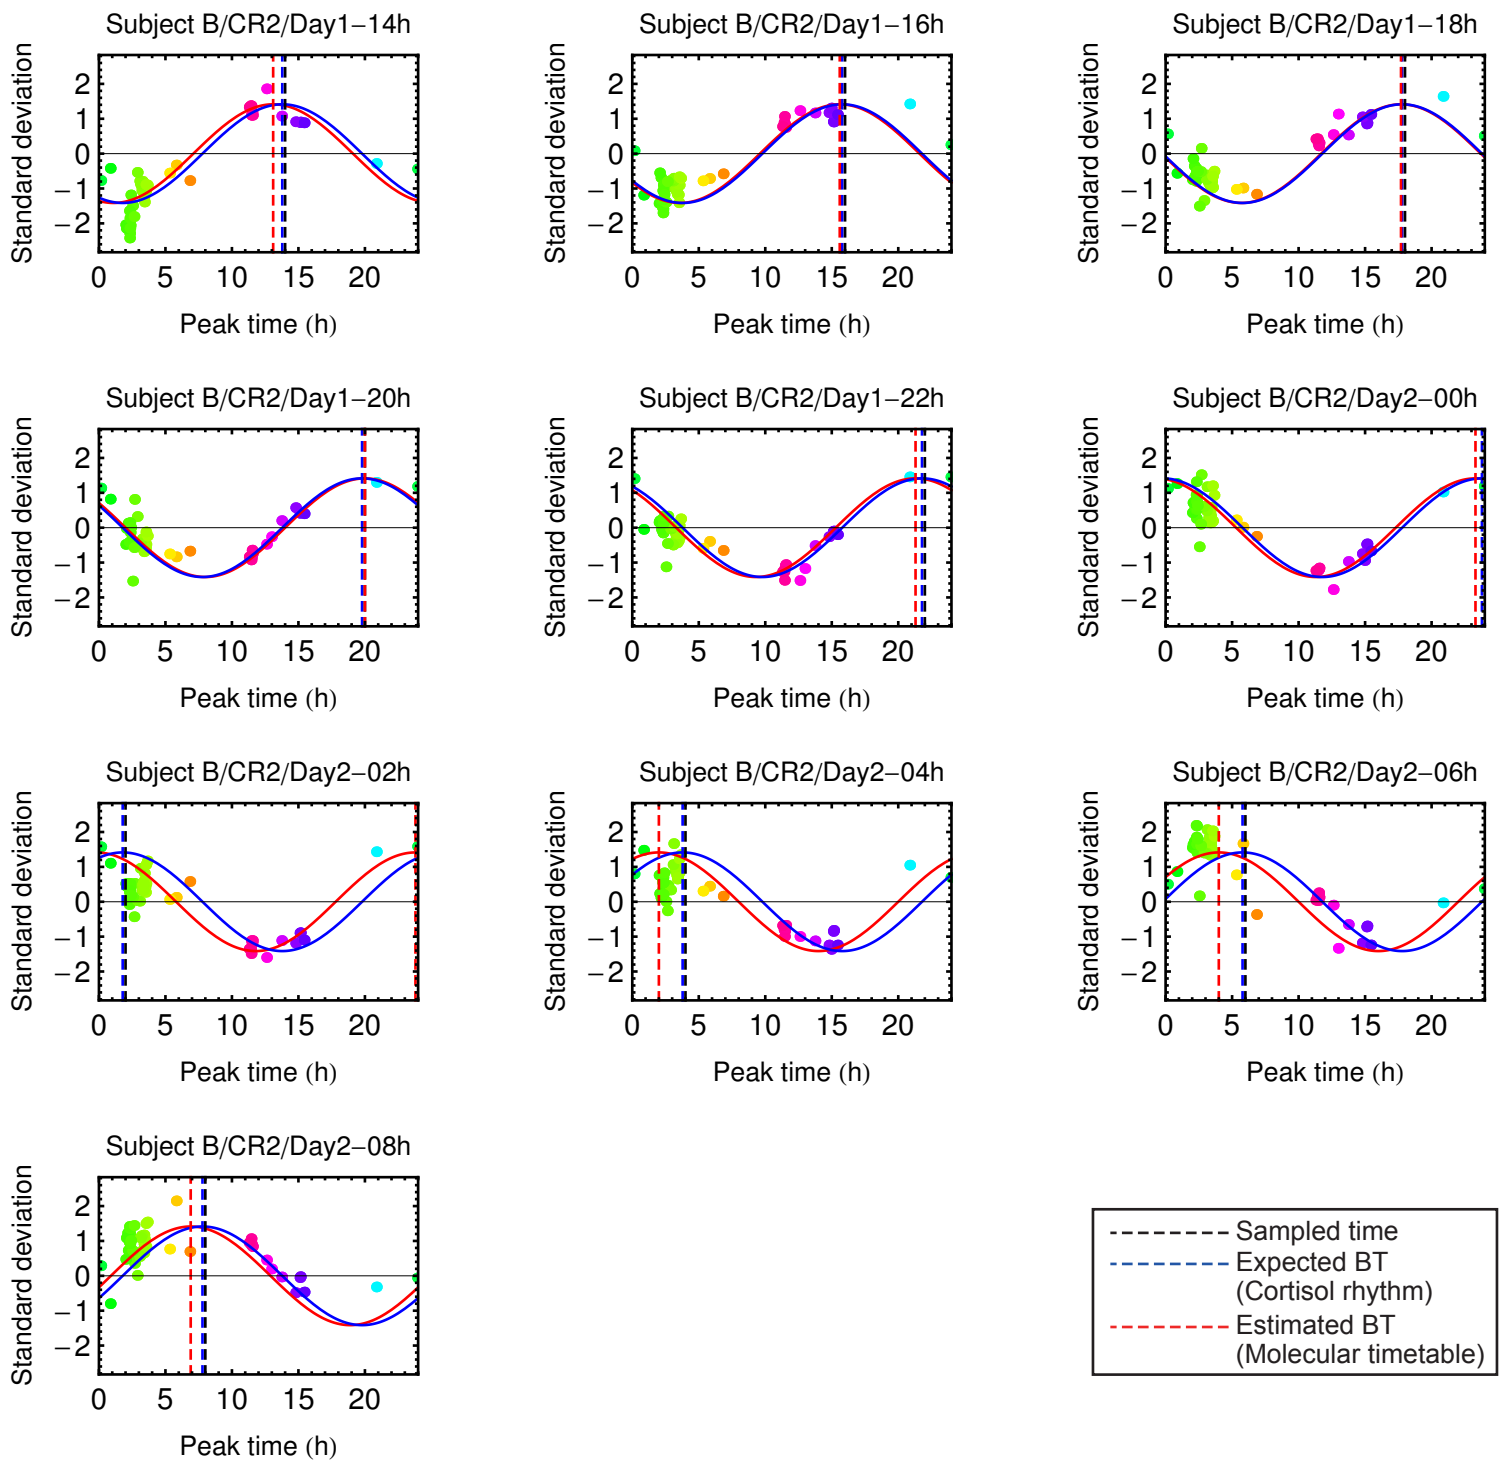

Fig. S2

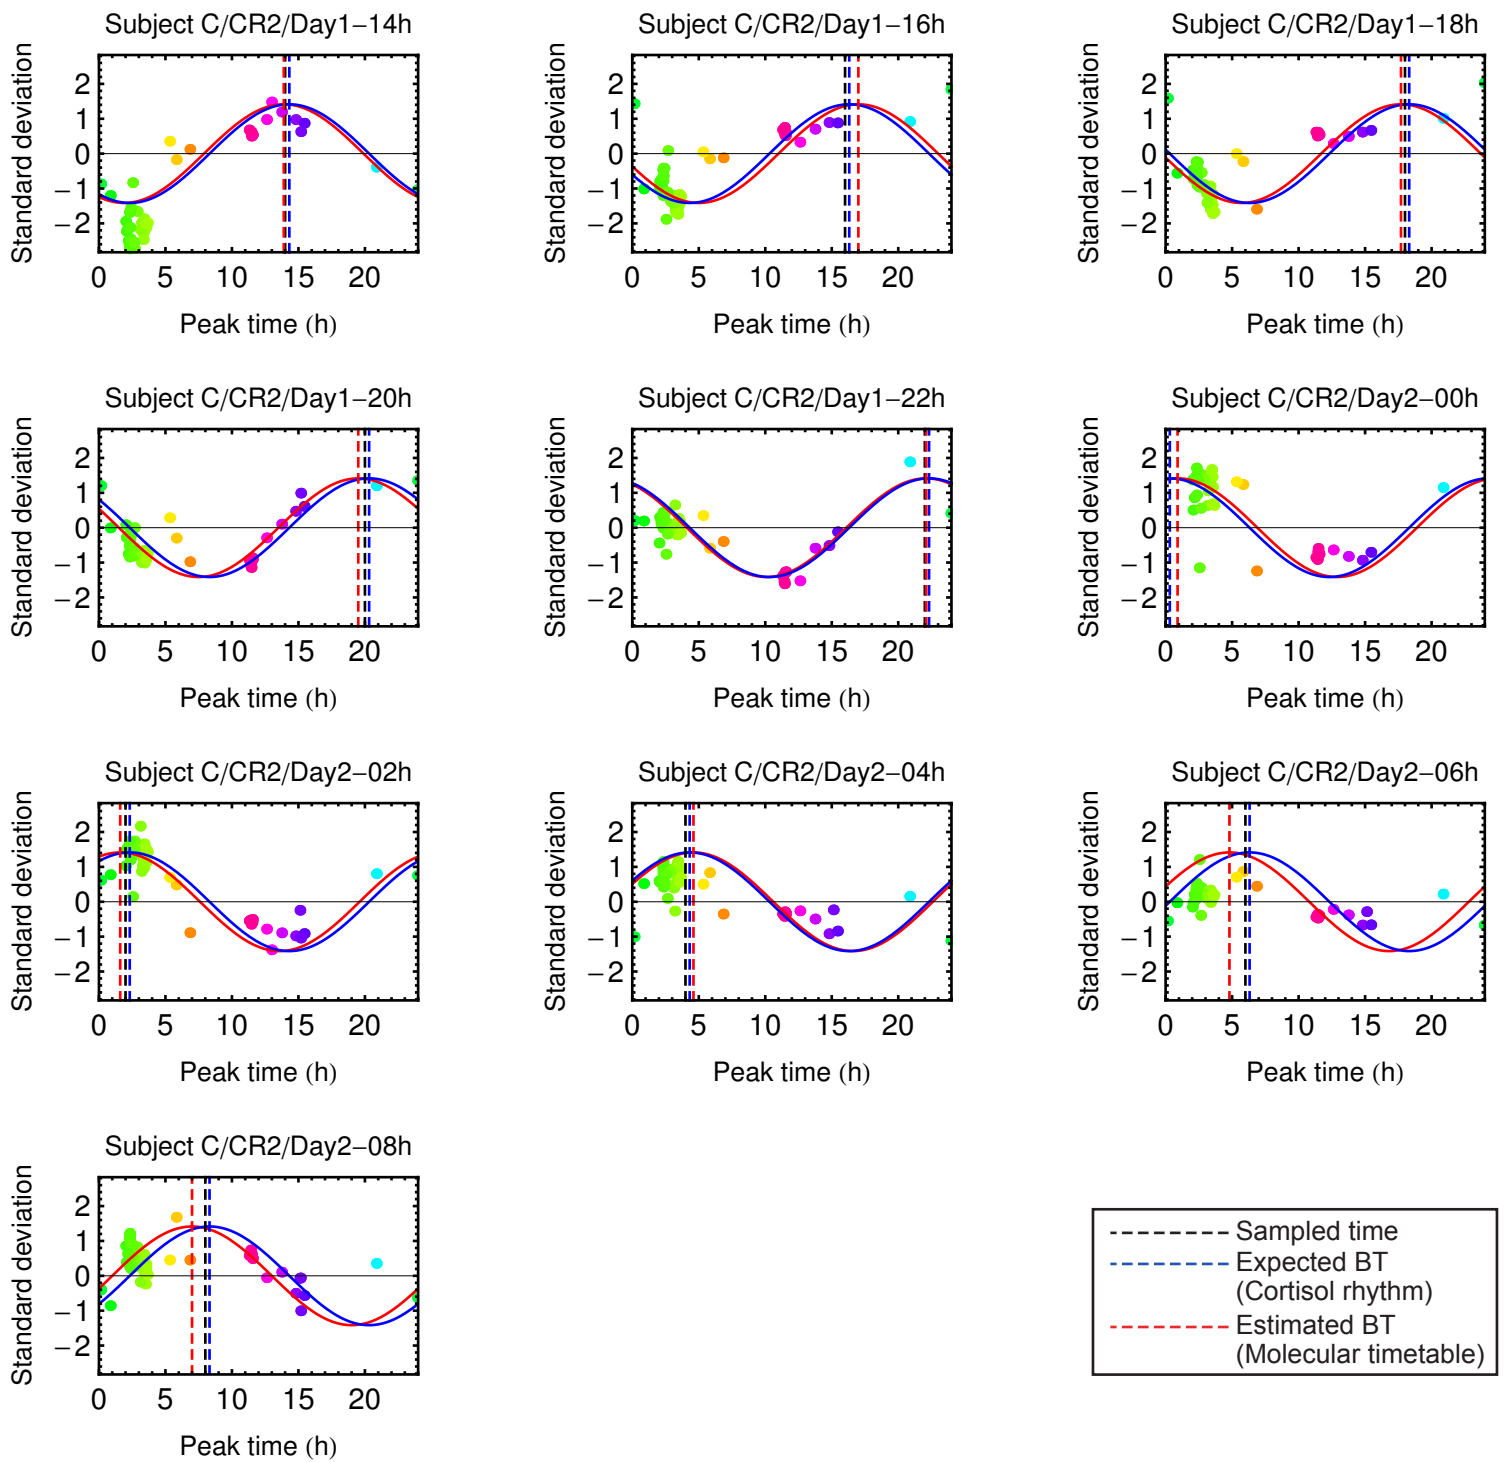

Fig. S2

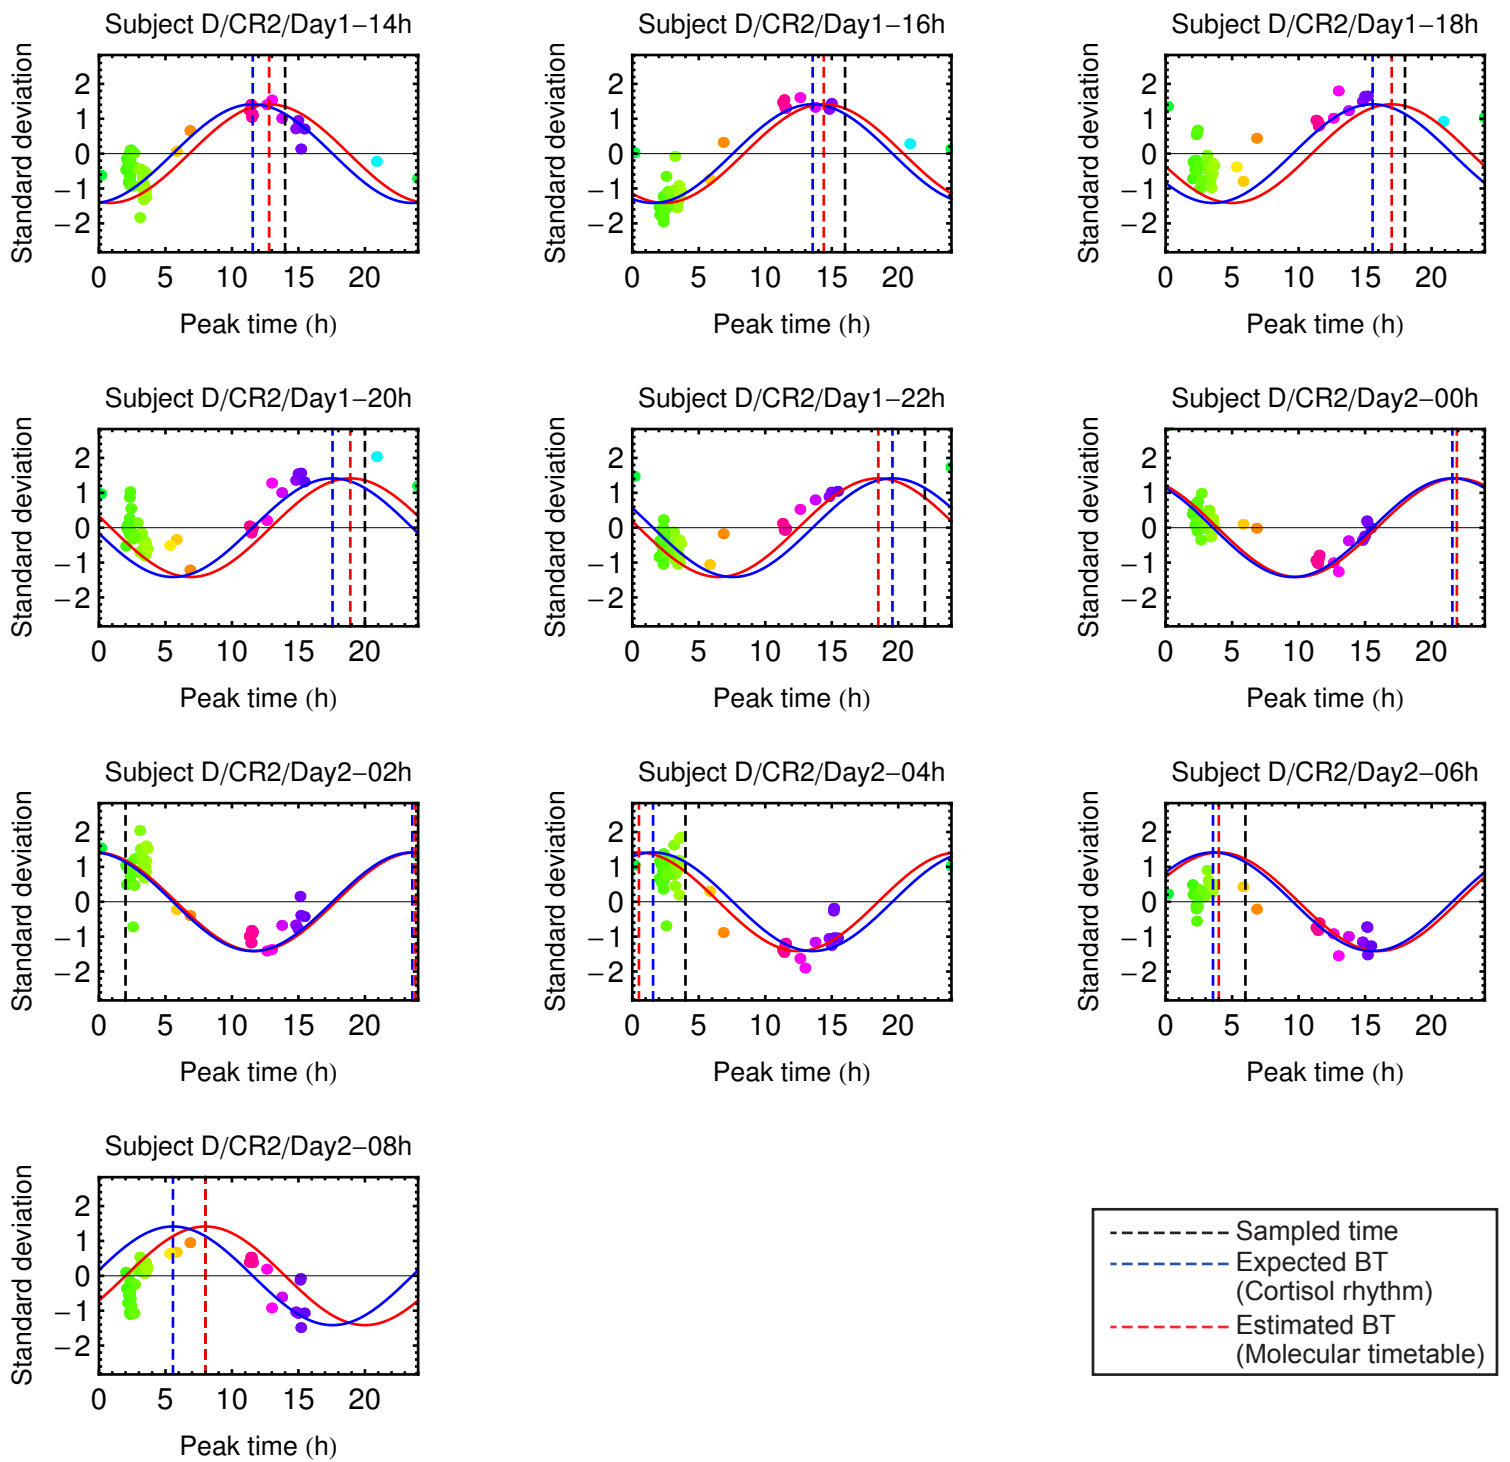

Fig. S2



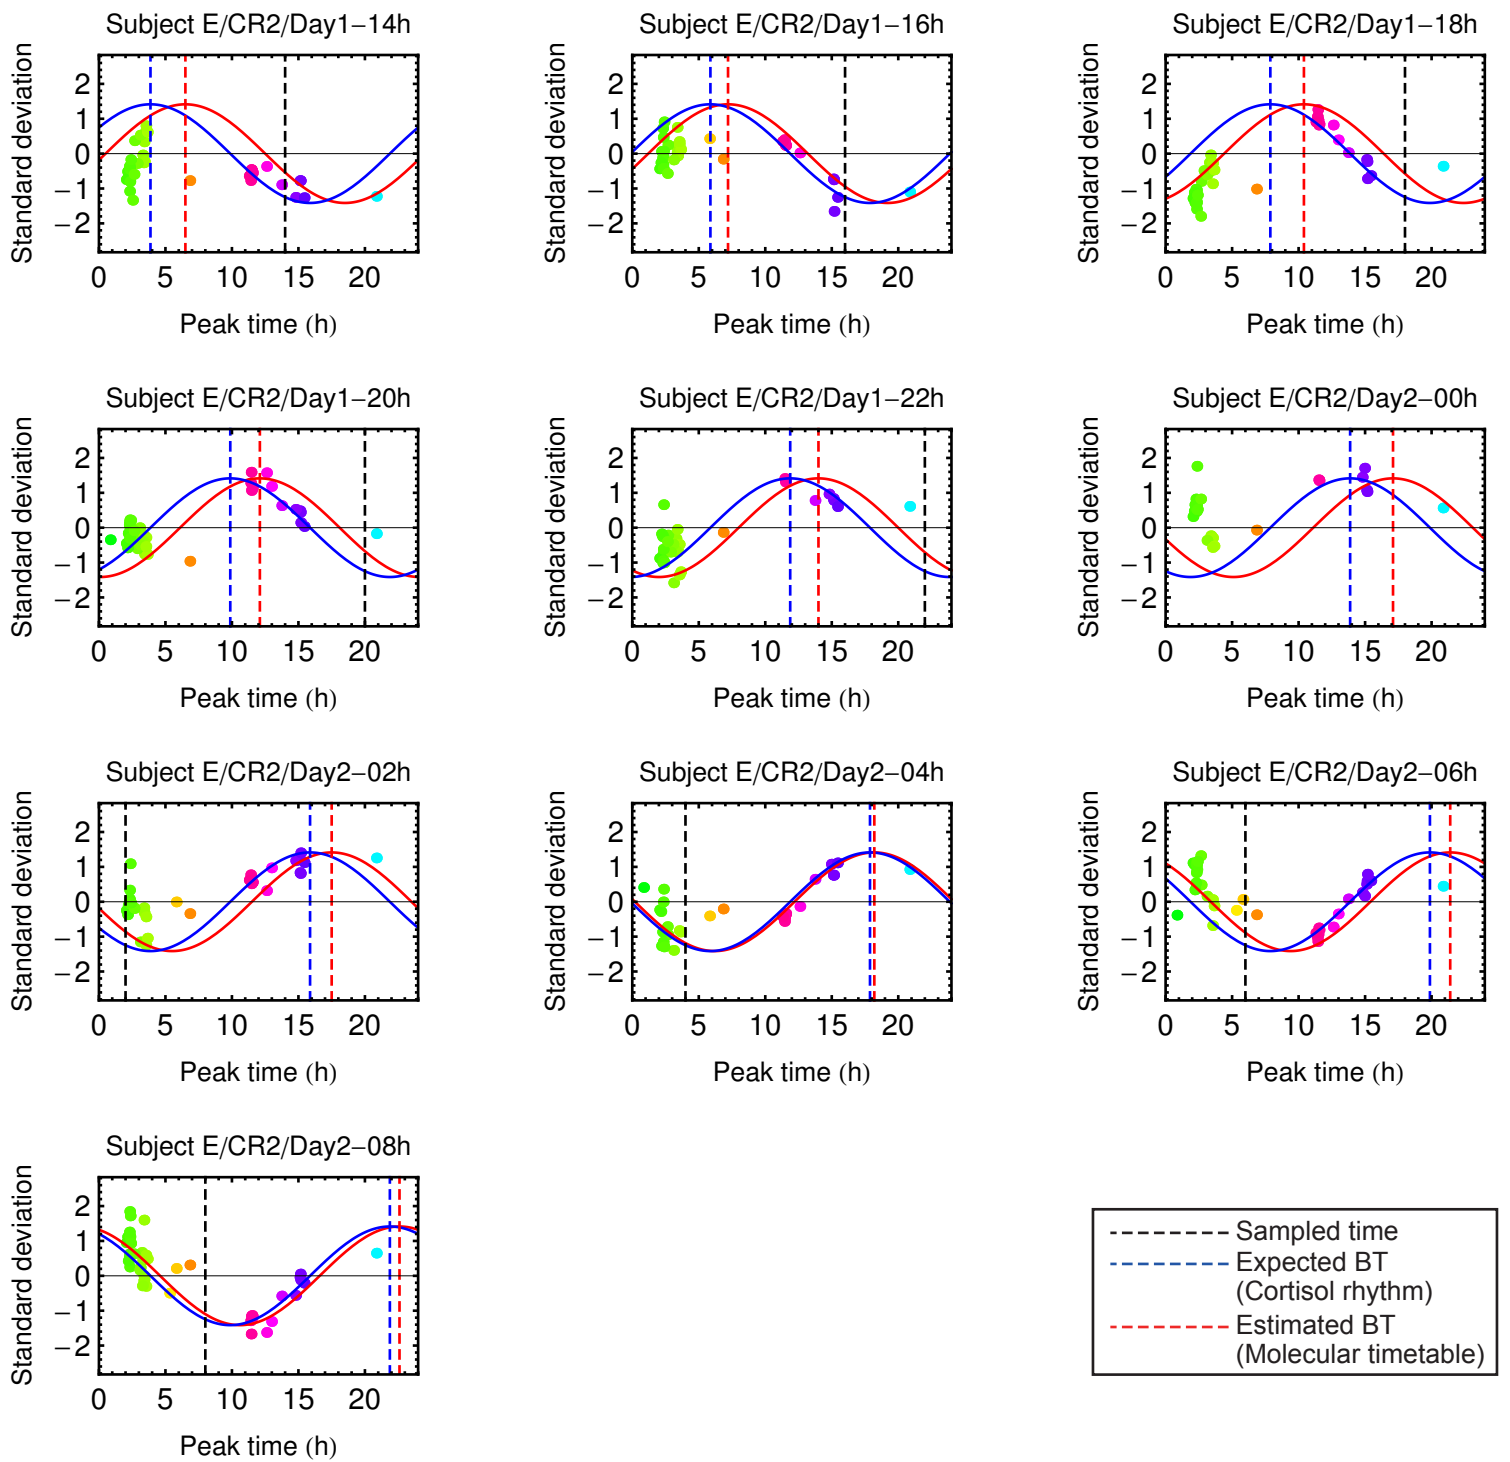

Fig. S2

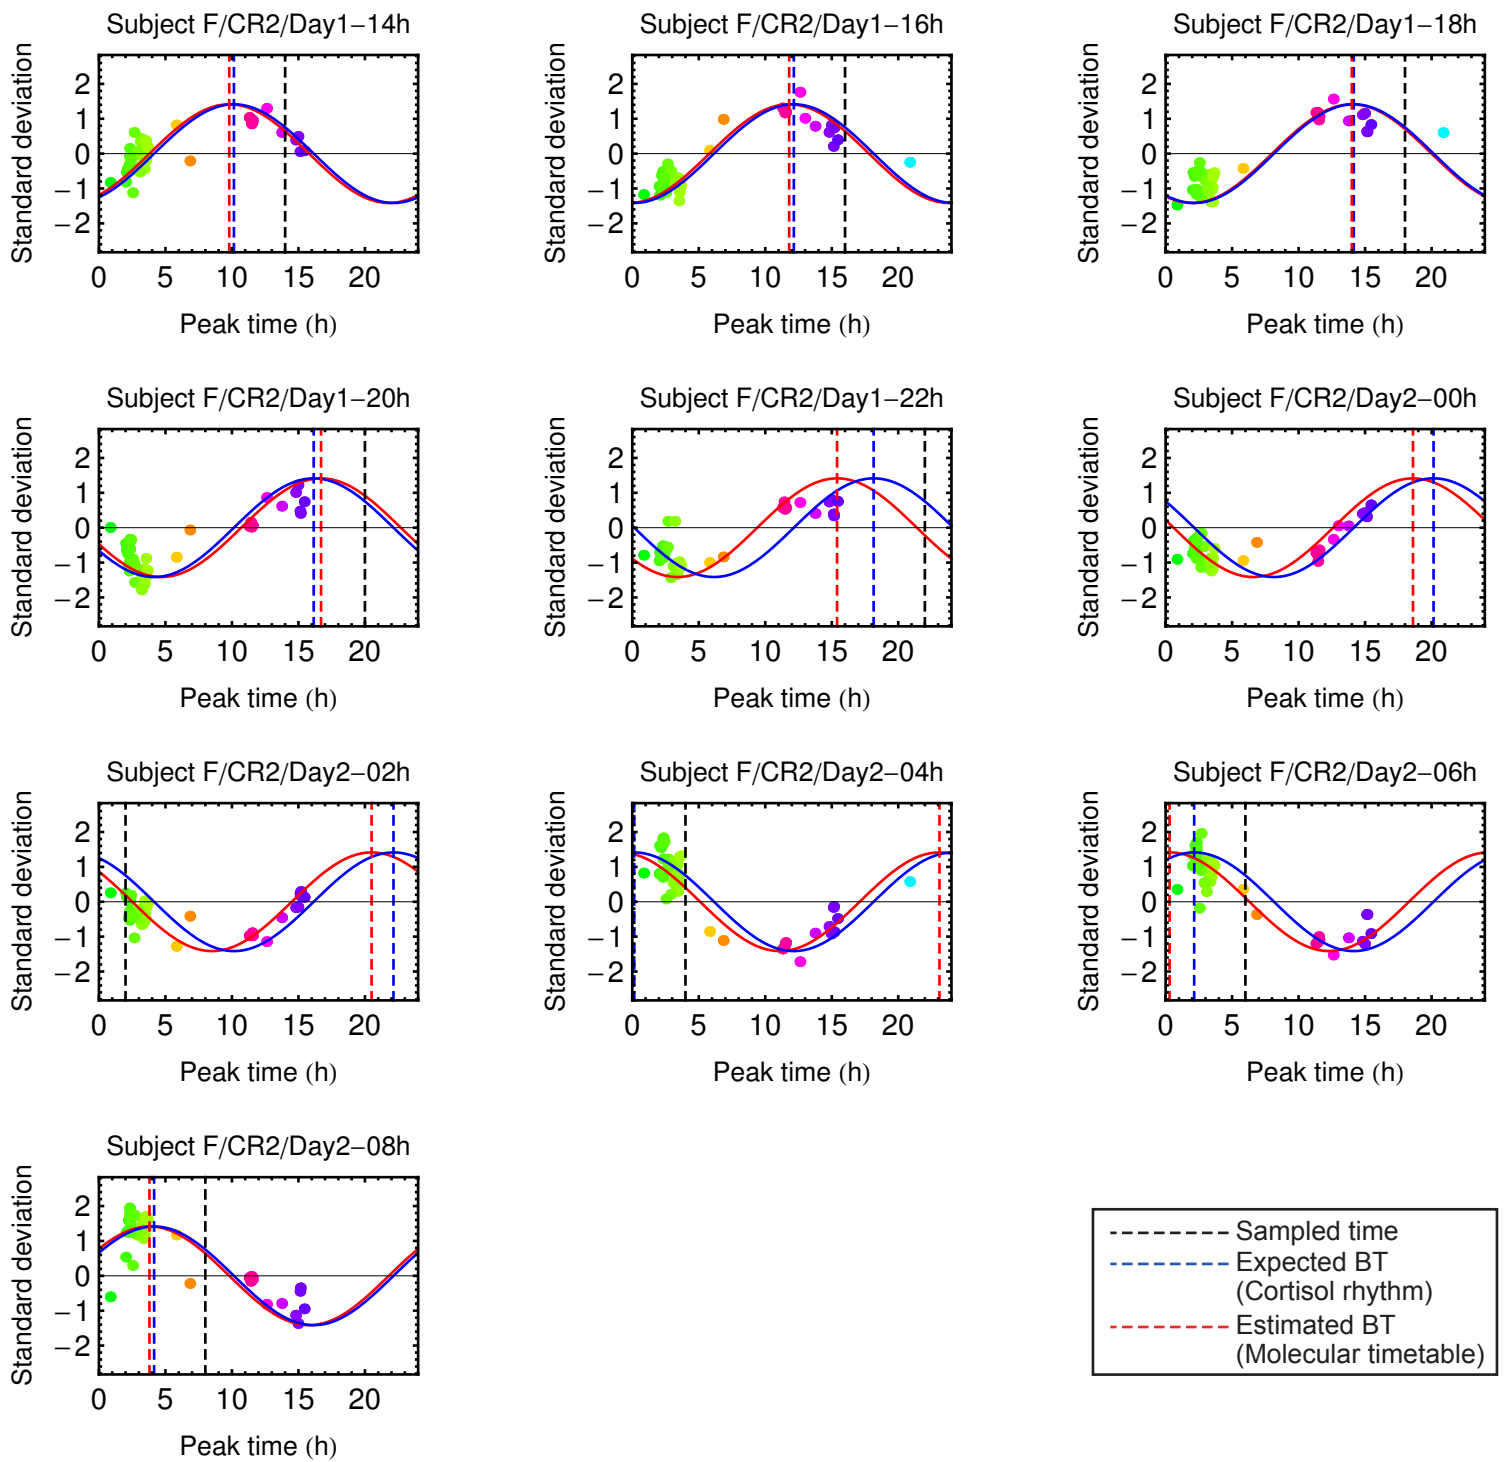

Fig. S2

Supplement: 1207768109_sfig02.pdf [file 1207768109_sfig02.pdf]

Fig. S4

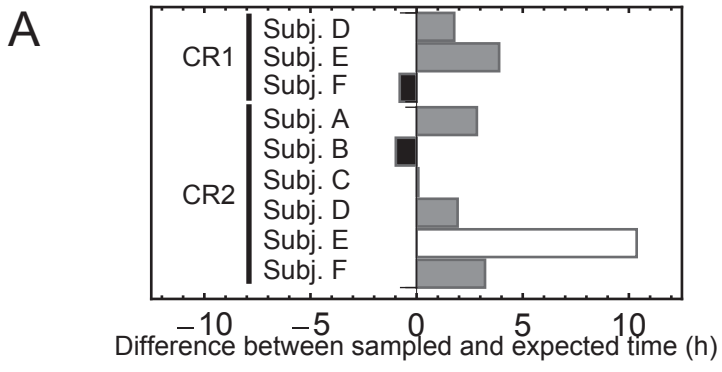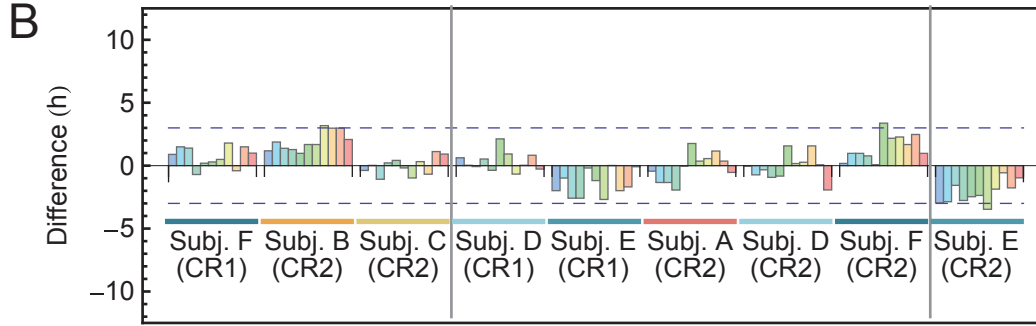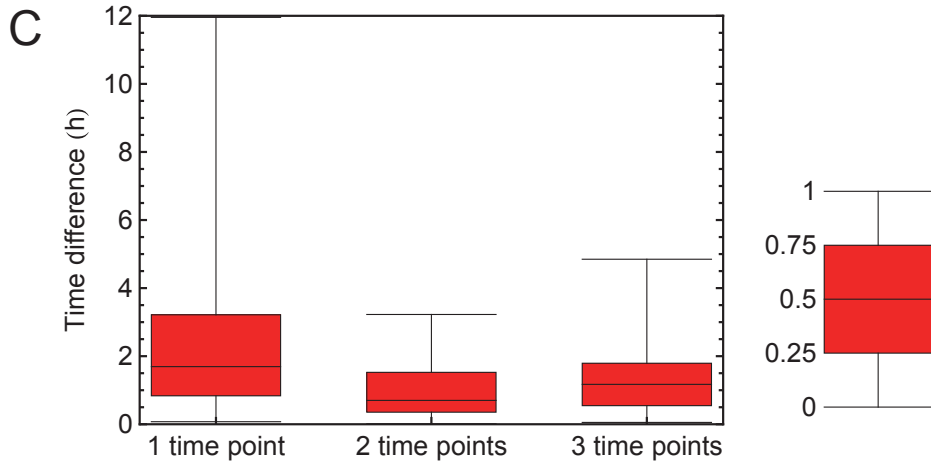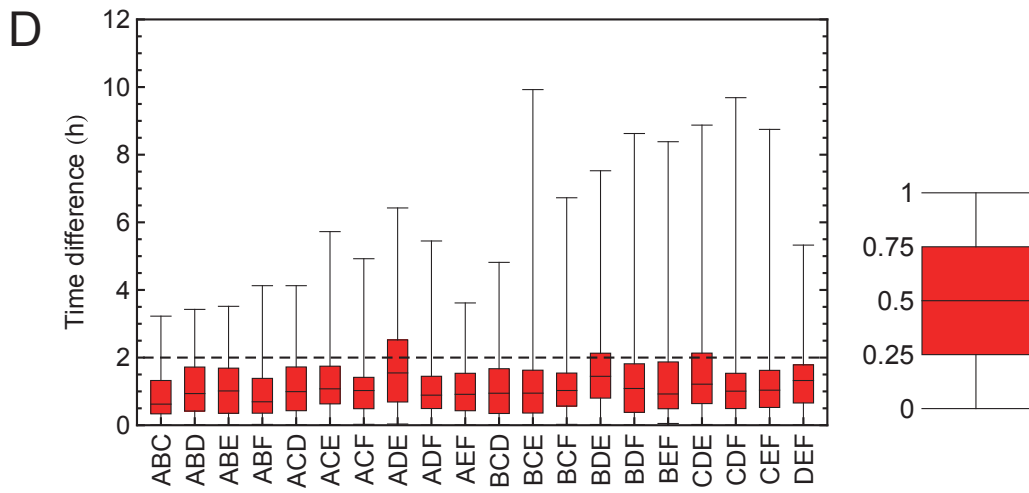

Supplement: 1207768109_sfig04.pdf [file 1207768109_sfig04.pdf]
